# Supplementary material
Source: Springer Nature journal article supplement (https://www.springermedizin.de/resource/supplementary/12889_2009_1914_MOESM1_ESM.pdf/9484980)

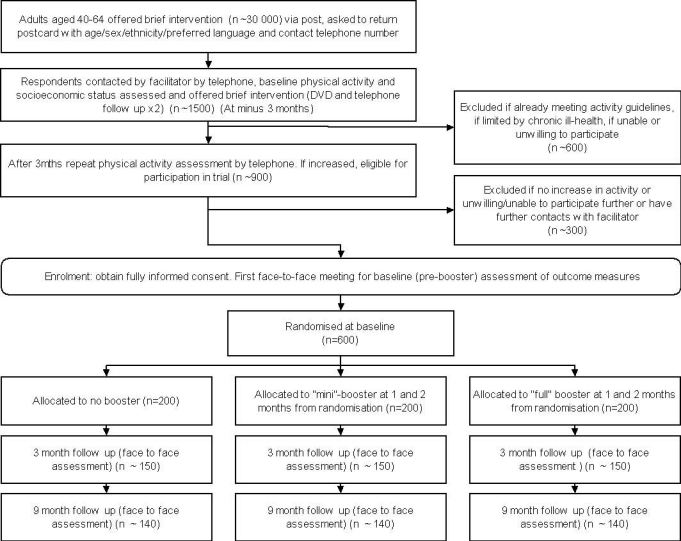

Supplement: MOESM1 [file 9484980]
